# Supplementary material
Source: publisher figshare collection journal article supplement (https://karger.figshare.com/ndownloader/files/26741945)
Supplement: Supplementary file 1 [file 26741945]

**Supplemental Table 1.** Logistic regression analyses to determine the odds ratios for sarcopenia and related parameters according to serum GDF15 quartiles

A) Unadjusted

| Serum GDF15  quartiles | Sarcopenia | |  | Low muscle mass | |  | Low muscle strength | |  | Low physical performance | |
| --- | --- | --- | --- | --- | --- | --- | --- | --- | --- | --- | --- |
| ORs (95% CIs) | *P* |  | ORs (95% CIs) | *P* |  | ORs (95% CIs) | *P* |  | ORs (95% CIs) | *P* |
| Q1 | 1.00 (Ref.) |  |  | 1.00 (Ref.) |  |  | 1.00 (Ref.) |  |  | 1.00 (Ref.) |  |
| Q2 | 4.06 (0.77–21.35) | 0.098 |  | 2.64 (0.72–9.72) | 0.144 |  | 0.97 (0.18–5.19) | 0.967 |  | 1.39 (0.51–3.74) | 0.521 |
| Q3 | 5.04 (0.98–26.09) | 0.054 |  | 2.35 (0.63–8.81) | 0.206 |  | 4.59 (0.96–27.01) | 0.073 |  | 2.87 (0.93–9.31) | 0.078 |
| Q4 | 2.15 (0.36–12.69) | 0.399 |  | 2.76 (0.75–10.19) | 0.127 |  | 2.72 (0.63–11.70) | 0.178 |  | 1.48 (0.54–4.03) | 0.446 |

B) Sex, age, and BMI adjusted

| Serum GDF15  quartiles | Sarcopenia | |  | Low muscle mass | |  | Low muscle strength | |  | Low physical performance | |
| --- | --- | --- | --- | --- | --- | --- | --- | --- | --- | --- | --- |
| ORs (95% CIs) | *P* |  | ORs (95% CIs) | *P* |  | ORs (95% CIs) | *P* |  | ORs (95% CIs) | *P* |
| Q1 | 1.00 (Ref.) |  |  | 1.00 (Ref.) |  |  | 1.00 (Ref.) |  |  | 1.00 (Ref.) |  |
| Q2 | 4.81 (0.76–30.43) | 0.095 |  | 3.50 (0.78–15.74) | 0.103 |  | 0.65 (0.11–3.68) | 0.622 |  | 1.01 (0.33–3.01) | 0.995 |
| Q3 | 5.42 (0.90–32.55) | 0.065 |  | 2.52 (0.56–11.23) | 0.226 |  | 3.49 (0.83–19.01) | 0.105 |  | 2.68 (0.87–8.26) | 0.086 |
| Q4 | 1.59 (0.22–11.37) | 0.642 |  | 2.62 (0.58–11.85) | 0.212 |  | 1.66 (0.36–7.74) | 0.519 |  | 0.99 (0.32–3.08) | 0.985 |

OR, odds ratio; CI, confidence interval; BMI, body mass index; Ref., reference. Serum GDF15 quartiles: Q1 = 292–1020 pg/mL, Q2 = 1021–1340 pg/mL, Q3 = 1341–1940 pg/mL, and Q4 = 1941–3344 pg/mL
